# Supplementary material for: Managing dental caries against the backdrop of COVID-19: approaches to reduce aerosol generation
Source: Springer Nature journal article supplement (doi:10.1038/s41415-020-2153-y), 2020-10-01
Supplement: MOESM1 [file 41415_2020_2153_MOESM1_ESM.pdf]

This is an Open Access document downloaded from ORCA, Cardiff University's institutional repository: <https://orca.cardiff.ac.uk/id/eprint/135732/>

This is the author's version of a work that was submitted to / accepted for publication.

Citation for final published version:

Eden, E., Frencken, J., Gao, S., Horst, J. and Innes, N. 2020. Managing dental caries against the backdrop of COVID-19: approaches to reduce aerosol generation. *British Dental Journal* 229 (7) , pp. 411-416. 10.1038/s41415-020-2153-y

Publishers page: <http://doi.org/10.1038/s41415-020-2153-y>

Please note:

Changes made as a result of publishing processes such as copy-editing, formatting and page numbers may not be reflected in this version. For the definitive version of this publication, please refer to the published source. You are advised to consult the publisher's version if you wish to cite this paper.

This version is being made available in accordance with publisher policies. See <http://orca.cf.ac.uk/policies.html> for usage policies. Copyright and moral rights for publications made available in ORCA are retained by the copyright holders.

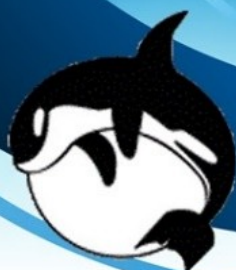

## Supplementary Information

### Further resources\*

#### General

There are some video tutorials of techniques available through the University of Dundee, School of Dentistry covering; “how to” for Selective Caries Removal, ART, the Hall Technique and techniques for placing glass ionomer fissure sealants.

<https://www.youtube.com/c/DundeeDentalSchool/videos>

For permanent and primary teeth in children, indications/contra-indications and more information can also be found in the full guidance version of the Scottish Dental Clinical Effectiveness guideline <https://www.sdcep.org.uk/published-guidance/caries-in-children/>. Section 10 also provides a guide on how to carry out most of the procedures covered here.

#### Silver Diamine Fluoride

Wikipedia\* [https://en.wikipedia.org/wiki/Silver\\_diammine\\_fluoride](https://en.wikipedia.org/wiki/Silver_diammine_fluoride)

A guide to the use of SDF can be found in this British Dental Journal article

<https://www.nature.com/articles/s41415-020-1203-9>

ADA video on placement of SDF <https://youtu.be/a0HH7GifdM4>

US IHS video on placement of SDF <https://youtu.be/aTDFAYxBbus>

A video on the use of the SDF in children <https://youtu.be/7aiyiRnXhQE>

Resources with patient information leaflets and Standard Operating Procedures can be found on the British Society for Paediatric Dentistry website

<https://www.bspd.co.uk/Professionals/Resources>

#### Hall Technique

A video showing use of the Hall Technique in children <https://youtu.be/ndxQEDw0rAM>

Wikipedia guide with a pdf of a manual on how to carry out the technique:

[https://en.wikipedia.org/wiki/Hall\\_Technique](https://en.wikipedia.org/wiki/Hall_Technique)

#### Atraumatic Restorative Treatment

Wikipedia\* [https://en.wikipedia.org/wiki/Atraumatic\\_Restorative\\_Treatment\\_\(ART\)](https://en.wikipedia.org/wiki/Atraumatic_Restorative_Treatment_(ART))

\* Although not always the most reliable source of information, with the support of Cochrane and the Wikipedia Editing Collaboration of Dental Schools, much of the information on Wikipedia related to Dentistry is being updated and the pages for ART and SDF have recently been added and contain useful links. Please note that these are open for all to edit so are subject to non-peer reviewed changes.
